# Supplementary material for: Nutrition Knowledge, Attitudes, and Practices (KAPs) among Jordanian Elderly—A Cross-Sectional Study
Source: MDPI journal article supplement (doi:10.3390/nu15092220), 2023-05-08
Supplement: s1 [file s1]

## Supplementary File- S2

الجامعة الأميركية في مادبا

كلية العلوم الصحية/ قسم التغذية والحميات

تقييم مدى المعرفة والاتجاه الإدراكي والممارسات التغذوية لدى كبار السن من الأردنيين/ دراسة مستعرضة

موافقة لجنة المراجعة المؤسسية رقم: -----

### نموذج الموافقة على المشاركة

السادة /السيدات المشاركين في الاستبانة المحترمين  
تعد المشاركة في هذه الدراسة اختيارية تمامًا. وإذا قررت عدم المشاركة فلن تكون هناك أي نتائج سلبية.  
سيحافظ الباحث على سرية المعلومات، وجميع البيانات ستكون مجهولة دون أي إشارة إلى هوية المشارك.  
من خلال تقديم هذا النموذج، فهذا يشير إلى أنك قد قرأت وصف الدراسة، وأنت في عمر 60 عاما وأكبر،  
وأنت توافق على الشروط الواردة فيها كما هو موضح.

إذا كانت لديك أي أسئلة أو ترغب في الحصول على نسخة من خطاب الموافقة هذا، فيرجى الاتصال  
مع الدكتورة فنوى حموه، قسم التغذية والحميات، كلية العلوم الصحية، الجامعة الأميركية في مادبا، الأردن  
البريد الإلكتروني: f.hammouh@aum.edu.jo

شكرا لكم مقدما على مشاركتكم!

\*ملاحظة: سيقوم مساعد الباحث مساعدتك في ملء الاستبانة وهذا يستغرق 20 دقيقة من وقتك وهذا محل تقديرنا.

\*نموذج الموافقة على المشاركة

( ) أوافق

( ) لا أوافق

التاريخ:

توقيع المشار □:

## Basic Information Questionnaire

### معلومات شخصية واجتماعية

\*يهدف هذا الاستبيان إلى تقييم مدى المعرفة والاتجاه الإدراكي والممارسات التغذوية لدى كبار السن من الأردنيين/ دراسة مستعرضة.  
\*تعباً جميع المعلومات من قبل المشترك/المشاركة أو قريب لهما في حالة عدم القدرة على الكتابة وذلك بإشراف الباحثين، مع العلم أن كافة المعلومات الواردة ستعامل سرية تامة، وفي حالة النشر لن ير الاسم في البحث إطلاقاً  
الرقم المتسلسل: ----- التاريخ: -----

### أولاً: المعلومات الشخصية والديموغرافية:

- \*المحافظة: ----- \*مكان السكن: ( ) قرية ( ) مدينة  
\*الجنسية: ----- \*الجنس: ( ) ذكر ( ) أنثى  
\*الحالة الاجتماعية: ( ) متزوج ( ) أعزب ( ) مطلق ( ) أرمل  
\*التعليم: ( ) غير متعلم ( ) توجيهي ( ) لوم متوسط ( ) كالوريوس ( ) أعلى من ذلك  
\*السكن: ( ) لوحده/لوحدها ( ) مع الزوج-الزوجة/ العائلة  
\*عدد أفراد الأسرة: عدد الذكور ( ) عدد الإناث ( )  
\*العمر: ( ) 60-69 عاماً ( ) 70-79 عاماً ( ) 80 عاماً وأكثر  
\*الوزن (كغم)= ----- \*آخر مرة قمت بها توزيع نفسك: -----  
\*أين قمت توزيع نفسك؟ -----  
\*الطول (متر)= ----- \*آخر مرة قمت بها قياس طولك: -----  
\*أين قمت قياس طولك؟ -----  
\*هل تعمل؟ ( ) نعم ( ) لا، إذا كانت الإجابة نعم، فحدّ عملك: -----  
\*الدخل الشهري للأسرة (دينار أردني):  
( ) أقل من 500 دينار ( ) 500 - 1000 دينار ( ) أكثر من 1000 دينار  
\*مصدر الدخل: ( ) العمل ( ) الأولاد ( ) راتب تقاعد (حدّ هـ) ( ) معونة وطنية (حدّ مصدرها)  
\*هل تدخن السجائر؟ ( ) نعم ( ) لا، إذا كانت الإجابة نعم، عدد السجائر التي تدخنها يومياً: -----  
\*هل تدخن الأرجيلة؟ ( ) نعم ( ) لا، إذا كانت الإجابة نعم، عدد مرات تدخين الأرجيلة أسبوعياً: -----  
\*هل تشرب الكحول؟ ( ) نعم ( ) لا، إذا كانت الإجابة نعم، حدّ الكمية: -----  
\* هل يجوز لكبار السن ممارسة الرياضة مثل المشي والسباحة ( ) نعم ( ) لا

\* الوجبات التي تتناولها يومياً؟ حدّ حسب الجدول التالي:

| الوجبة     | نعم | لا | مع من تناولت الوجبة؟ |
|------------|-----|----|----------------------|
| الإفطار    |     |    |                      |
| وجبة خفيفة |     |    |                      |
| الغذاء     |     |    |                      |
| وجبة خفيفة |     |    |                      |
| العشاء     |     |    |                      |
| وجبة خفيفة |     |    |                      |

### ثانياً: معلومات صحية

- \*هل تعاني من مشاكل أسنان؟ ( ) نعم ( ) لا  
إذا كانت الإجابة نعم، حدّ المشكلة: -----  
\*هل لديك الأسنان البديلة (الطارة كاملة أو جزء منها)؟ ( ) نعم ( ) لا  
\*هل تعاني مشاكل في النظر؟ ( ) نعم ( ) لا  
إذا كانت الإجابة نعم، حدّ المشكلة: ( ) طول نظر ( ) قصر نظر ( ) الماء الزرقاء

( ) غيرها ، حد:

\*هل تعاني من أمراض مزمنة؟ ( ) نعم ( ) لا

### ثالثا: أسئلة المعرفة

| الرقم | السؤال                                          | نعم | لا |
|-------|-------------------------------------------------|-----|----|
| 1     | هل تعلم أن سوء التغذية مرضا؟                    |     |    |
| 2     | هل تعلم أن لسوء التغذية مضاعفات؟                |     |    |
| 3     | هل تعلم ما هي أعراض سوء التغذية؟                |     |    |
| 4     | هل تعلم ما هو مؤشر كتلة الجسم؟                  |     |    |
| 5     | هل تعلم ما هو المستوى الطبيعي لمؤشر كتلة الجسم؟ |     |    |
| 6     | هل تعتبر الوجبات السريعة مؤذية للذكور؟          |     |    |
| 7     | هل تعتبر الوجبات السريعة مؤذية للإناث؟          |     |    |
| 8     | هل تعتبر السمنة سوء تغذية؟                      |     |    |
| 9     | هل للرياضة فائدة في حالة سوء التغذية؟           |     |    |

### رابعا: أسئلة الاتجاه الإدراكي

| الرقم | السؤال                                                                              | أوافق بشدة | أوافق | محايد | لا أوافق | لا أوافق بشدة |
|-------|-------------------------------------------------------------------------------------|------------|-------|-------|----------|---------------|
| 1     | يُعتبر حساب مؤشر كتلة الجسم مهم                                                     |            |       |       |          |               |
| 2     | تعد زيارة الطبيب صورة ودية دون أن أكون مريضا شيئا إلزاميا                           |            |       |       |          |               |
| 3     | أنا أعتقد أنني يجب أن أقوم بتوزيع نفسي وريا                                         |            |       |       |          |               |
| 4     | أنا أعتقد أنني يجب أن أقوم بتقييم جودة غذائي من ناحية الكمية والتنوعية              |            |       |       |          |               |
| 5     | الصحة التغذوية تساوي في الأهمية مع الصحة النفسية                                    |            |       |       |          |               |
| 6     | التغذية الجيدة مهمة في حالات المرض مثل الدواء                                       |            |       |       |          |               |
| 7     | وجبة العشاء مهمة مثل وجبة الفطور                                                    |            |       |       |          |               |
| 8     | يجب أن أتناول الفطور يوميا                                                          |            |       |       |          |               |
| 9     | يُعتبر القيام بتمارين رفع الأثقال والاحماء والإطالة أساسية يوميا                    |            |       |       |          |               |
| 10    | مهم أن أكل زيت الزيتون يوميا                                                        |            |       |       |          |               |
| 11    | مهم أن أكل الخضروات أكثر من 3 حصص يوميا                                             |            |       |       |          |               |
| 12    | مهم أن أشرب على الأقل 4 كأس من الماء                                                |            |       |       |          |               |
| 13    | أعتقد أن اللبنة والسمن البلدي يجب تناولهما حذر وشكل ضئيل                            |            |       |       |          |               |
| 14    | أعتقد أن السكريات والحلويات الشرقية أغذية فارغة من البروتينات والفيتامينات والمعادن |            |       |       |          |               |
| 15    | أعتقد أن العسل والتمر لا يجب الإكثار منهما                                          |            |       |       |          |               |
| 16    | أثق أن خبز النخالة والخبز الحبوب أفضل من الخبز الأبيض                               |            |       |       |          |               |
| 17    | يجب قراءة النشرات المرفقة مع الدواء حتى لا يحد مضاعفات                              |            |       |       |          |               |
| 18    | أعرف أن المضاعفات الدوائية سبب في سوء التغذية أو سبب في منع الشهية                  |            |       |       |          |               |
| 19    | أفهم أن الكالسيوم مهم للعظام وأهمية المغنسيوم وفيتامين ال ومخزون الحديد             |            |       |       |          |               |

### خامسا: أسئلة الممارسات:

| الرقم | السؤال | نعم | لا |
|-------|--------|-----|----|
|-------|--------|-----|----|

|   |                                                                                                                                            |  |  |
|---|--------------------------------------------------------------------------------------------------------------------------------------------|--|--|
| 1 | هل يجب تقليل الدهون والوجبات السريعة في طعامك؟                                                                                             |  |  |
| 2 | هل تقوم <input type="checkbox"/> الفحص أو الحساب المنتظم لمؤشر كتلة الجسم؟                                                                 |  |  |
| 3 | هل تقوم <input type="checkbox"/> مراجعة الطبيب <input type="checkbox"/> انتظام حتى ولو لم تكن تعاني من مرض أو شكوى؟                        |  |  |
| 4 | هل تمارس الرياضة <input type="checkbox"/> انتظام <input type="checkbox"/> واقع 30 دقيقة / 5 أيام <input type="checkbox"/> الأسبوع أو أكثر؟ |  |  |
| 5 | هل تحرص على تناول الفطور يوميا؟                                                                                                            |  |  |
| 6 | هل تتناول 3 وجبات رئيسية؟                                                                                                                  |  |  |
| 7 | هل تهتم <input type="checkbox"/> الحصول على مكملات غذائية (فيتامينات أو معادن)؟                                                            |  |  |
| 8 | هل تقرأ <input type="checkbox"/> طاقة البيان للأغذية <input type="checkbox"/> حيث تعرف محتوى السعرات والدهون والسكر وغيرها؟                |  |  |
| 9 | هل تتقيد <input type="checkbox"/> مواعيد الدواء وتراعى الالتزام في حال وجوب <input type="checkbox"/> تداخل مع الغذاء؟                      |  |  |
